# Supplementary material for: Specific Binding Ratio Estimation of [123I]-FP-CIT SPECT Using Frontal Projection Image and Machine Learning
Source: MDPI journal article supplement (doi:10.3390/diagnostics13081371), 2023-04-07
Supplement: s1 [file s1]

Article

# Supplementary Materials: Specific Binding Ratio Estimation of [ $^{123}\text{I}$ ]-FP-CIT SPECT Using Frontal Projection Image and Machine Learning

Akinobu Kita <sup>1,\*</sup>, Hidehiko Okazawa <sup>2,\*</sup>, Katsuya Sugimoto <sup>1</sup>, Nobuyuki Kosaka <sup>3</sup>, Eiji Kidoya <sup>1</sup>  
and Tetsuya Tsujikawa <sup>3</sup>

|   |                                    |          |
|---|------------------------------------|----------|
| I | Input<br>Dataset : x               | 1,40,40  |
| C | Convolution<br>KemelShape : 7, 7   | 16,34,34 |
| R | ReLU                               | 16,34,34 |
| M | MaxPooling<br>Shape : 2, 2         | 16,17,17 |
| C | Convolution_2<br>KemelShape : 7, 7 | 40,11,11 |
| M | MaxPooling_2<br>Shape : 2, 2       | 40,5,5   |
| T | Tanh                               | 40,5,5   |
| A | Affine                             | 50       |
| R | ReLU_2                             | 50       |
| A | Affine_2                           | 1        |
| S | SquaredError<br>T.Dataset:y        | 1        |

(a)

|   |                                    |          |
|---|------------------------------------|----------|
| I | Input<br>Dataset : x               | 1,40,40  |
| C | Convolution<br>KemelShape : 3, 3   | 64,40,40 |
| R | ReLU                               | 64,40,40 |
| B | BatchNormalization                 | 64,40,40 |
| M | MaxPooling<br>Shape : 2, 2         | 64,20,20 |
| C | Convolution_2<br>KemelShape : 3, 3 | 40,20,20 |
| R | ReLU_2                             | 40,20,20 |
| B | BatchNormalization_2               | 40,20,20 |
| M | MaxPooling_2<br>Shape : 2, 2       | 40,10,10 |
| C | Convolution_3<br>KemelShape : 3, 3 | 40,10,10 |
| R | ReLU_3                             | 40,10,10 |
| C | Convolution_4<br>KemelShape : 3, 3 | 40,10,10 |
| R | ReLU_4                             | 40,10,10 |
| C | Convolution_5<br>KemelShape : 3, 3 | 40,10,10 |
| R | ReLU_5                             | 40,10,10 |
| M | MaxPooling_3<br>Shape : 2, 2       | 40,5,5   |
| A | Affine                             | 50       |
| R | ReLU_6                             | 50       |
| D | Dropout<br>P : 0.5                 | 50       |
| A | Affine_2                           | 50       |
| R | ReLU_7                             | 50       |
| D | Dropout_2<br>P : 0.5               | 50       |
| A | Affine_3                           | 1        |
| S | SquaredError<br>T.Dataset:y        | 1        |

(b)

**Figure S1.** Two types of network diagrams, (a) LeNet and (b) AlexNet. The layer's function is indicated by square boxes. The specifications for each layer are depicted in the figures on the right side of the box. The web site <https://dl.sony.com/> (accessed on 6 April 2023) describes additional details in this figure (Sony Network Communications Inc., 2020).
